# Supplementary material
Source: HighWire-hosted journal article supplement (http://www.qdcxjkg.com/highwire/filestream/113504/field_highwire_adjunct_files/0/Supplementary_tables_1-4.pdf)
Supplement: Supplementary_tables_1-4.pdf [file Supplementary_tables_1-4.pdf]

**Supplementary table 1.** Characteristics of the analysis cohort participants, Nord-Trøndelag Health Study, Norway (n=23 191).

| Baseline characteristics                                                                                        | Women<br>(n=12 760) |      | Men<br>(n=10 431) |      |
|-----------------------------------------------------------------------------------------------------------------|---------------------|------|-------------------|------|
|                                                                                                                 | n                   | %    | n                 | %    |
| <b>Age (years)</b>                                                                                              |                     |      |                   |      |
| 19-29                                                                                                           | 2 111               | 16.5 | 1 543             | 14.8 |
| 30-39                                                                                                           | 3 910               | 30.6 | 3 032             | 29.1 |
| 40-49                                                                                                           | 4 930               | 38.6 | 4 247             | 40.7 |
| 50-55                                                                                                           | 1 809               | 14.2 | 1 609             | 15.4 |
| <b>Family history of asthma<sup>a</sup></b>                                                                     | 2 137               | 18.2 | 1 240             | 12.8 |
| <b>Smoking<sup>a</sup></b>                                                                                      | 4 055               | 33.6 | 2 628             | 26.4 |
| <b>Physical activity (hours/week)<sup>a</sup></b>                                                               |                     |      |                   |      |
| <1                                                                                                              | 2 583               | 22.2 | 2 669             | 29.2 |
| 1-2                                                                                                             | 4 990               | 42.8 | 3 369             | 36.8 |
| ≥3                                                                                                              | 4 079               | 35.0 | 3 115             | 34.0 |
| <b>Education (years)<sup>a</sup></b>                                                                            |                     |      |                   |      |
| ≤10                                                                                                             | 2 716               | 21.5 | 1 943             | 18.8 |
| 11-12                                                                                                           | 6 419               | 51.3 | 5 796             | 56.0 |
| ≥13                                                                                                             | 3 444               | 27.2 | 2 603             | 25.2 |
| <b>Social benefit recipient<sup>a</sup></b>                                                                     | 2 890               | 27.3 | 1 073             | 13.1 |
| <b>Economic difficulties<sup>a</sup></b>                                                                        | 3 688               | 33.1 | 2 686             | 31.0 |
| <b>Allergic rhinitis<sup>a</sup></b>                                                                            | 2 693               | 26.0 | 1 674             | 21.1 |
| <b>Gastroesophageal reflux disease<sup>a</sup></b>                                                              | 3 937               | 39.0 | 3 593             | 45.9 |
| <b>Waist circumference</b>                                                                                      |                     |      |                   |      |
| ≥88 cm in women,<br>≥102 cm in men                                                                              | 2 239               | 17.6 | 924               | 8.9  |
| <b>Triglycerides (mmol/L)</b>                                                                                   |                     |      |                   |      |
| ≥1.7mmol/L                                                                                                      | 2 651               | 20.8 | 4 922             | 47.2 |
| <b>HDL cholesterol</b>                                                                                          |                     |      |                   |      |
| <1.3 mmol/L in women,<br><1.0 mmol/L in men                                                                     | 3 109               | 24.4 | 1 819             | 17.4 |
| <b>Elevated blood pressure or use of anti-hypertensive medication</b>                                           |                     |      |                   |      |
| Systolic blood pressure ≥130 mm Hg or diastolic blood pressure ≥85 mm Hg or use of anti-hypertensive medication | 4 652               | 36.5 | 6 757             | 64.8 |
| <b>Elevated glucose or diabetes</b>                                                                             |                     |      |                   |      |
| ≥5.6 mmol/L and ≥4 hours since last meal or diabetes                                                            | 253                 | 2.0  | 346               | 3.3  |

HDL: high-density lipoprotein.

<sup>a</sup> Number of observations does not include total cohort because of missing.

**Supplementary table 2.** Association (odds ratios) of metabolic syndrome and its components with incident asthma in women (n=12 760).

| <b>Metabolic components</b>                                                       | <b>Total</b> | <b>Incident asthma</b> | <b>Model 1</b> (adjusted age and family history of asthma) | <b>Model 2</b> (adjusted all covariates) | <b>Model 3</b> (adjusted all covariates and other metabolic components) |
|-----------------------------------------------------------------------------------|--------------|------------------------|------------------------------------------------------------|------------------------------------------|-------------------------------------------------------------------------|
| <i>OR (95% CI)</i>                                                                |              |                        |                                                            |                                          |                                                                         |
| <b>Waist circumference</b><br>≥88 cm                                              | 2 239        | 158                    | 1.94 (1.60 to 2.35)                                        | 1.81 (1.49 to 2.20)                      | 1.59 (1.28 to 1.97)                                                     |
| <b>Triglycerides</b><br>≥1.7 mmol/L                                               | 2 651        | 164                    | 1.61 (1.33 to 1.94)                                        | 1.45 (1.19 to 1.75)                      | 1.15 (0.93 to 1.43)                                                     |
| <b>HDL cholesterol</b><br><1.3 mmol/L                                             | 3 109        | 188                    | 1.59 (1.32 to 1.90)                                        | 1.41 (1.17 to 1.70)                      | 1.21 (0.99 to 1.48)                                                     |
| <b>Elevated blood pressure<sup>a</sup> or use of anti-hypertensive medication</b> | 4 652        | 221                    | 1.20 (1.01 to 1.44)                                        | 1.21(1.01 to 1.45)                       | 1.07 (0.89 to 1.30)                                                     |
| <b>Elevated glucose<sup>b</sup> or diabetes</b>                                   | 253          | 20                     | 1.89 (1.18 to 3.02)                                        | 1.85 (1.15 to 2.96)                      | 1.63 (1.01 to 2.62)                                                     |
| <b>Metabolic syndrome<sup>c</sup></b><br>≥3 components                            | 1 434        | 105                    | 1.88 (1.51 to 2.36)                                        | 1.69 (1.35 to 2.13)                      | n/a                                                                     |

CI: confidence interval, HDL: high-density lipoprotein, n/a: not applicable, OR: odds ratio.

Model 1 adjusted for age and family history of asthma; Model 2 adjusted for age, family history of asthma, smoking, physical activity, education, social benefit and economic difficulties at baseline; Model 3 adjusted for all covariates and other metabolic risk factors.

<sup>a</sup> Systolic blood pressure ≥130 mm Hg or diastolic blood pressure ≥85 mm Hg.

<sup>b</sup> Elevated glucose was ≥5.6 mmol/L and ≥4 hours since last meal.

<sup>c</sup> Metabolic syndrome was defined according to the Joint Interim Statement clinical criteria including alternate indicators anti-hypertensive medication and diabetes. Glucose was non-fasting and ≥4 hours since last meal.

**Supplementary table 3.** Association (odds ratios) of metabolic syndrome and its components with incident asthma in men (n=10 431).

| Metabolic components                                                        | Total | Incident asthma | Model 1 (adjusted age and family history of asthma) | Model 2 (adjusted all covariates) | Model 3 (adjusted all covariates and other metabolic components) |
|-----------------------------------------------------------------------------|-------|-----------------|-----------------------------------------------------|-----------------------------------|------------------------------------------------------------------|
|                                                                             |       |                 | <i>OR (95% CI)</i>                                  |                                   |                                                                  |
| Waist circumference $\geq 102$ cm                                           | 924   | 47              | 1.65 (1.20 to 2.28)                                 | 1.55 (1.12 to 2.14)               | 1.56 (1.12 to 2.17)                                              |
| Triglycerides $\geq 1.7$ mmol/L                                             | 4 922 | 160             | 1.01 (0.81 to 1.26)                                 | 1.00 (0.80 to 1.24)               | 0.96 (0.76 to 1.21)                                              |
| HDL cholesterol $< 1.0$ mmol/L                                              | 1 819 | 59              | 1.01 (0.76 to 1.34)                                 | 0.99 (0.74 to 1.33)               | 0.97 (0.72 to 1.32)                                              |
| Elevated blood pressure <sup>a</sup> or use of anti-hypertensive medication | 6 757 | 219             | 1.02 (0.81 to 1.28)                                 | 1.02 (0.81 to 1.29)               | 1.00 (0.79 to 1.26)                                              |
| Elevated glucose <sup>b</sup> or diabetes                                   | 346   | 15              | 1.37 (0.81 to 2.34)                                 | 1.28 (0.75 to 2.18)               | 1.23 (0.72 to 2.10)                                              |
| Metabolic syndrome <sup>c</sup> $\geq 3$ components                         | 1 537 | 67              | 1.45 (1.10 to 1.91)                                 | 1.41 (1.07 to 1.87)               | n/a                                                              |

CI: confidence interval, HDL: high-density lipoprotein, n/a: not applicable, OR: odds ratio.

Model 1 adjusted for age and family history of asthma; Model 2 adjusted for age, family history of asthma, smoking, physical activity, education, social benefit and economic difficulties at baseline; Model 3 adjusted for all covariates and other metabolic risk factors.

<sup>a</sup> Systolic blood pressure  $\geq 130$  mm Hg or diastolic blood pressure  $\geq 85$  mm Hg.

<sup>b</sup> Elevated glucose was  $\geq 5.6$  mmol/L and  $\geq 4$  hours since last meal.

<sup>c</sup> Metabolic syndrome was defined according to the Joint Interim Statement clinical criteria including alternate indicators anti-hypertensive medication and diabetes. Glucose was non-fasting and  $\geq 4$  hours since last meal.

**Supplementary table 4.** Subgroup analysis according to allergic rhinitis: Association (odds ratios) of metabolic syndrome with incident asthma stratified by allergic rhinitis.

|  | Total | Incident asthma | Unstratified | Stratified by allergic rhinitis |
|--|-------|-----------------|--------------|---------------------------------|
|  |       |                 | (n=23 191)   |                                 |
|  |       |                 |              |                                 |

|                                           |       | <b>Yes</b><br>(n=13 921)                | <b>No</b><br>(n=4 367) | <b>Missing</b><br>(n=4 903) |                     |                     |
|-------------------------------------------|-------|-----------------------------------------|------------------------|-----------------------------|---------------------|---------------------|
|                                           |       | <i>Adjusted OR (95% CI)<sup>a</sup></i> |                        |                             |                     |                     |
| <b>Metabolic syndrome</b><br><sup>b</sup> | 2 971 | 172                                     | 1.57(1.31 to 1.87)     | 1.44 (1.08 to 1.94)         | 1.67 (1.27 to 2.19) | 1.51 (0.99 to 2.29) |
| ≥3 components                             |       |                                         |                        |                             |                     |                     |

CI: confidence interval, OR: odds ratio.

<sup>a</sup> Adjusted for age, sex, family history of asthma, smoking, physical activity, education, social benefit and economic difficulties at baseline.

<sup>b</sup> Metabolic syndrome was defined according to the Joint Interim Statement clinical criteria including alternate indicators anti-hypertensive medication and diabetes. Glucose was non-fasting and ≥4 hours since last meal.
